1 **Title: Intestinal infection results in impaired lung innate immunity to**  
2 **secondary respiratory infection.**

3 **Subtitle: Lung immunity after gut inflammation.**

4 Shubhanshi Trivedi,<sup>1</sup> Allie H. Grossmann,<sup>3,5,6</sup> Owen Jensen,<sup>1</sup> Mark J. Cody,<sup>4</sup> Kristi J.  
5 Warren,<sup>2</sup> Christian C. Yost,<sup>4,6</sup> and Daniel T. Leung<sup>1,7</sup>

6 <sup>1</sup>Division of Infectious Disease, <sup>2</sup>Division of Pulmonary Medicine, Department of Internal  
7 Medicine; <sup>3</sup>Huntsman Cancer Institute; <sup>4</sup>Division of Neonatology, Department of  
8 Pediatrics; <sup>5</sup>Division of Anatomic Pathology, <sup>6</sup>Molecular Medicine Program; <sup>7</sup>Division of  
9 Microbiology and Immunology, Department of Pathology; University of Utah, Salt Lake  
10 City, UT, USA.

11

12

13

14

15

16

17

18

19 **Corresponding author:**

20 Daniel T Leung, M.D.

21 Address: 26 North Medical Drive, Salt Lake City, UT 84132, USA

22 Telephone: 801-581-8804

23 Fax: 801-585-3377

24 Email: [daniel.leung@utah.edu](mailto:daniel.leung@utah.edu)

25

26 **Abstract**

27 Pneumonia and diarrhea are among the leading causes of death worldwide, and  
28 epidemiological studies have demonstrated that diarrhea is associated with an  
29 increased risk of subsequent pneumonia. Our aim was to determine the impact of  
30 intestinal infection on innate immune responses in the lung. Using a mouse model of  
31 intestinal infection by *Salmonella enterica* serovar Typhimurium (*S. Typhimurium*), we  
32 investigated how infection in the gut compartment can modulate immunity in the lungs  
33 and impact susceptibility to bacterial (*Klebsiella pneumoniae*) challenge. We found  
34 alterations in frequencies of innate immune cells in lungs of intestinally-infected mice  
35 compared to uninfected mice. On subsequent challenge with *K. pneumoniae* we found  
36 that mice with prior intestinal infection have higher lung bacterial burden and  
37 inflammation, increased neutrophil margination, and neutrophil extracellular traps  
38 (NETs), but lower overall numbers of neutrophils, compared to mice without prior  
39 intestinal infection. Together, these results suggest that intestinal infection impacts lung  
40 innate immune responses, most notably neutrophil characteristics, potentially resulting  
41 in increased susceptibility to secondary pneumonia.

42

43

44

45

46

47

48 **Author summary**

49 Infections of the lung and gut are among the leading causes of death worldwide. Human  
50 studies have shown that children with diarrhea are at higher risk of subsequent lung  
51 infection. How intestinal infections impact lung immunity is not well known. In the  
52 present study, we reveal that bacterial infection of the intestinal mucosa may  
53 compromise lung immunity, offering new insights into increased susceptibility to  
54 respiratory infections. We found that upon respiratory infection, mice with prior intestinal  
55 infection are more moribund and despite having higher bacterial burden, they show  
56 reduced numbers of neutrophils in the lung compared to mice without prior intestinal  
57 infection. We also found excessive neutrophil extracellular traps formation in the lungs  
58 of mice with prior intestinal infection, providing evidence of increased pulmonary tissue  
59 damage. Collectively, these data identify a direct link between pulmonary and enteric  
60 infection and suggests gut infections impair neutrophils responses in the lungs.

## 61 **Introduction**

62 Diarrhea and pneumonia are among the leading causes of death worldwide. In children  
63 alone, these diseases combine to kill ~1.4 million each year, with the majority of these  
64 deaths occurring in lower and middle-income countries [1]. Epidemiological studies  
65 have shown that children are at an increased risk of pneumonia following a diarrheal  
66 episode [2-5]. However, the immunological mechanisms behind an increased  
67 susceptibility to such secondary respiratory infections are not well understood.

68 Although the gastrointestinal and respiratory tracts have different environments and  
69 functions, there is emerging data showing cross-talk between these two mucosal sites  
70 in chronic inflammatory diseases such as inflammatory bowel disease (IBD), asthma,  
71 and chronic obstructive pulmonary disease [6-10]. Additionally, there is emerging  
72 evidence that the intestinal microbiota plays a role in host defense against bacterial  
73 pneumonia [11, 12]. The gastrointestinal and respiratory tracts share the same  
74 embryonic origin and have common components of the mucosal immune system such  
75 as an epithelial barrier, submucosal lymphoid tissue, the production of IgA and  
76 defensins, toll-like receptor expression, and the presence of innate lymphocytes and  
77 dendritic cells [13]. Leukocytes circulate between peripheral tissue, lymphatics, and  
78 blood, to survey for foreign antigens. Notably, several innate-like leukocytes, such as  
79 Mucosal Associated Invariant T (MAIT) cells, invariant Natural Killer T (iNKT) cells,  
80 gamma delta T ( $\gamma\delta$  T) cells, innate lymphoid cells (ILCs), dendritic cells (DC) and  
81 neutrophils, have the capacity to circulate between tissues, and play important roles in  
82 both respiratory and intestinal tract immunity [14-17].

83 It is anticipated that organs with the same embryonic origin share the same pathological  
84 specificities in a disease, for example, an increased number of inflammatory cells have  
85 been reported in bronchoalveolar lavage (BAL) fluid [18] and sputum [19] of IBD  
86 patients. How intestinal infection impacts immunity in the lung is not known. In this  
87 study, we examine the impact of intestinal infection on the immune response in the  
88 lungs of mice using *Salmonella enterica* serovar Typhimurium (*S. Typhimurium*), an  
89 established model of intestinal infections. We found that mice infected with *S.*  
90 *Typhimurium* have increased susceptibility to respiratory *Klebsiella pneumoniae*

91 infection compared to mice without prior intestinal infection. Prior intestinal infection  
92 modulated effector cells of innate immunity in the lung, contributing to respiratory  
93 immune dysregulation and a higher *K. pneumoniae* bacterial burden. This study furthers  
94 our understanding of the gut-lung immunological crosstalk, and begins to define the  
95 mechanisms of increased susceptibility to secondary pneumonia following diarrheal  
96 infections.

## 97 **Results**

### 98 **1. Mice with prior *S. Typhimurium* intestinal infection have increased lung** 99 **bacterial load, sickness score, and susceptibility to respiratory *K. pneumoniae*** 100 **infection.**

101 To test whether prior intestinal infection increases the susceptibility to respiratory *K.*  
102 *pneumoniae* infection, we evaluated survival, body weight loss, sickness score, and  
103 bacterial burden in lungs post *K. pneumoniae* challenge. Compared to *S. Typhimurium*  
104 infected mice, which had a survival rate of 90-100%, and *K. pneumoniae* infected mice,  
105 which had a survival of 60-80%, mice with prior *S. Typhimurium* intestinal infection had  
106 a survival rate of 0-30% at 120 hours post *K. pneumoniae* infection (Fig 1A).

107 Interestingly, although there were no statistically significant differences in body weight  
108 loss between mice with or without *S. Typhimurium* infection with *K. pneumoniae*  
109 challenge (Supplementary Figure S1), mice with prior intestinal infection had a higher  
110 sickness score (Fig 1B). This sickness scoring system included hunched posture, ruffled  
111 fur, decreased movement and altered respiratory rates and quality of breaths (Fig 1C).  
112 Of note, mice with only *S. Typhimurium* intestinal infection showed no weight loss and  
113 had reduced sickness scores. When bacterial burden was evaluated at 18 and 33 hours  
114 post *K. pneumoniae* infection, we found significantly higher lung bacterial burden in  
115 mice with prior intestinal infection compared to mice without prior intestinal infection (Fig  
116 1D and 1E). We did not find any *S. Typhimurium* bacterial burden in lungs of mice with  
117 intestinal infection.

118

### 119 **2. Mice with prior *S. Typhimurium* intestinal infection have increased lung** 120 **inflammation from subsequent respiratory *K. pneumoniae* infection.**

121 We next examined the degree of lung inflammation by histological analysis of tissue  
122 sections from all four groups of mice. Histopathological analysis revealed mixed  
123 interstitial inflammatory consolidations in mice with *K. pneumoniae* respiratory infection  
124 and increased microabscess formation with pyknotic neutrophils in mice co-infected with  
125 *S. Typhimurium* and *K. pneumoniae* (Fig 2A). Uninfected mice and mice with intestinal  
126 infection showed normal alveolar and interstitial lung histology (Fig 2A). Upon challenge  
127 with *K. pneumoniae* respiratory infection, mice with prior *S. Typhimurium* intestinal

128 infection also showed marked intravascular clustering of polymorphonuclear neutrophils  
129 (PMNs), with increased margination, necrotic cluster formation and extravasation (Fig  
130 2B and Supplementary Figure S2). Intravascular neutrophil clustering was noticeably  
131 absent in the other treatment groups. Furthermore, lung sections from mice with  
132 intestinal infection, and mice with both intestinal and respiratory infection, showed  
133 scattered microthrombi in capillary-sized vessels whereas mice with *K. pneumoniae*  
134 respiratory infection (with no prior intestinal infection) showed no microthrombi formation  
135 (Supplementary Figure S3).

136

### 137 **3. Mice with prior *S. Typhimurium* intestinal infection have altered lung cytokine** 138 **profiles after *K. pneumoniae* challenge.**

139 The delicate balance between pro- and anti-inflammatory cytokines is crucial in  
140 containing pathogens and maintaining tissue repair and homeostasis in the lung [11].  
141 Prior studies have shown the importance of cytokines such as IFN- $\gamma$  in recruitment of  
142 neutrophils to the lung tissue [20, 21]. We investigated whether intestinal infection  
143 affected cytokine production in lung homogenates, and whether prior intestinal infection  
144 affected this cytokine response to intranasal *K. pneumoniae* challenge. Our results  
145 indicate that compared with the uninfected control group, *S. Typhimurium* infected mice  
146 had significantly higher lung levels of IFN- $\gamma$ , MCP-1 and IL-1 $\beta$  (Fig 3 A,B and C). While  
147 Thy1-expressing natural killer (NK) cells [22] and NKp46<sup>+</sup> ILC3 [23] cells are commonly  
148 thought as the sources of IFN- $\gamma$ , there is a mounting evidence that neutrophils are a  
149 prominent cellular source of IFN- $\gamma$  during the innate phase of *S. Typhimurium*-induced  
150 colitis [24]. It is possible that large number of primed neutrophils traffick to lungs after  
151 intestinal infection, contribute to cytokine production and increases the potential for  
152 neutrophil-mediated pathology or NET formation upon secondary infection [17].  
153 Furthermore, following *K. pneumoniae* challenge, mice with prior intestinal infection had  
154 higher levels of IFN- $\gamma$  and lower levels of GM-CSF cytokine production in lung  
155 homogenates compared to those without prior intestinal infection (Fig 3A and D). Levels  
156 of IL-23, IL-1 $\alpha$ , TNF $\alpha$ , IL-12p70, IL-10, IL-6, IL-27, IL-17A and IFN- $\beta$  were not  
157 significantly different between mice with and without prior intestinal infection  
158 (Supplementary Figure S4).

159 **4. Mice with prior *S. Typhimurium* intestinal infection have lower number of**  
160 **neutrophils in lung after *K. pneumoniae* challenge.**

161 We next examined the impact of intestinal infection on innate cellular responses in the  
162 lung, and also its effect on such responses to *K. pneumoniae* respiratory challenge. We  
163 analyzed changes in major innate lung leukocytes (plasmacytoid dendritic cells (pDCs),  
164 monocyte-derived dendritic cells (moDCs), CD103<sup>+</sup> DCs, neutrophils, alveolar  
165 macrophages (AMs) and interstitial macrophages (IMs)) pre- and post-*K. pneumoniae*  
166 challenge in mice infected with *S. Typhimurium*. Consistent with previous studies [9], we  
167 observed rapid and robust recruitment of neutrophils to the lungs at 18 hours following  
168 *K. pneumoniae* infection compared to uninfected controls. Interestingly, mice with prior  
169 intestinal infection had significantly lower frequencies and total number of lung  
170 neutrophils following *K. pneumoniae* challenge compared to *K. pneumoniae* infected  
171 mice (Fig 4A and Supplementary Figure 5A). Furthermore, results indicated that  
172 frequencies of pDCs increased and moDCs decreased in the lungs of *S. Typhimurium*  
173 intestinally infected mice compared to uninfected controls (Fig 4B and C). Following  
174 intranasal *Klebsiella* challenge, we found a marked increase in frequencies of pDCs and  
175 significantly lower frequencies of moDCs in mice with prior intestinal infection compared  
176 to those without prior intestinal infection (Fig 4B and C). No significant differences were  
177 observed in frequencies of CD103<sup>+</sup> DCs (Fig 4D), AMs and IMs (Fig 4E and F) between  
178 *K. pneumoniae* infected mice with and without prior intestinal infection. Total numbers of  
179 pDCs, moDCs, CD103<sup>+</sup> DCs, AMs or IMs were not different in mice with prior intestinal  
180 infection compared to those without prior intestinal infection (Supplementary Figure S5  
181 B-F). We also found higher numbers of neutrophils, pDCs and IMs and lower numbers  
182 of CD103<sup>+</sup> DCs in mice with only intestinal infection compared to uninfected mice  
183 (Supplementary Figure S5 B-F).

184  
185 We also investigated innate-like T cells including mucosal-associated invariant T (MAIT)  
186 cells, invariant natural killer T (iNKT) cells and  $\gamma\delta$  T cells as they are known to play an  
187 important role in bacterial infections [10]. No differences were observed in percentage  
188 frequencies of iNKT cells, MAITs or  $\gamma\delta$  T cells between mice with and without prior  
189 intestinal infection (Supplementary Figure S6). Furthermore, when complete blood



190 counts were assessed with a Hemavet analyzer, no significant differences were  
191 observed in circulating neutrophils, lymphocytes, monocytes, eosinophils, basophils and  
192 platelets between mice with and without prior intestinal infection (Supplementary Figure  
193 S7).

194

## 195 **5. Mice with prior *S. Typhimurium* intestinal infection induces widespread** 196 **NETosis after *K. pneumoniae* challenge.**

197 Recent studies have revealed that excessive NET formation plays a role in pathogen-  
198 associated lung injury, including in models of bacterial pneumonia [25-28]. Our  
199 histopathological analysis revealed clusters of pyknotic neutrophils and thrombus  
200 formation in mice with prior intestinal infection (Fig 2 and Supplementary figure 3). It is  
201 known that neutrophils constitute the main cellular component of thrombi, and mainly  
202 participate in thrombosis by releasing NETs [29]. Moreover, we detected higher levels of  
203 IFN- $\gamma$  in mice with prior intestinal infection compared to mice without prior intestinal  
204 infection (Fig 3), and IFN- $\gamma$  can promote NET formation by neutrophils [30]. We  
205 therefore explored whether prior intestinal infection induces NET formation. We  
206 examined citrullinated histones and myeloperoxidase (MPO) in lung tissues of each  
207 experimental group by immunofluorescence. As expected, significantly higher number  
208 of NETs ( $p = 0.0006$ ) were detected in mice with prior intestinal infection compared to  
209 those without prior intestinal infection (Fig 5 A and B), as demonstrated by the presence  
210 of extracellular DNA overlaid with citrullinated histone 3 and MPO (Fig 5A). Mock-  
211 infected lungs did not show any staining for citrullinated histone 3 or MPO (Fig 5A). We  
212 detected NETs in lung tissues of mice with *S. Typhimurium* intestinal infection  
213 compared to uninfected control or *K. pneumoniae* infected alone, and there was no  
214 significant difference between these groups (Fig 5B).

## 215 Discussion

216 We found that bacterial intestinal infection in mice adversely impacts immunity in the  
217 lung, increasing susceptibility to secondary respiratory infection. We show that mice  
218 with prior intestinal *S. Typhimurium* infection have higher lung bacterial burden and  
219 sickness scores after subsequent *K. pneumoniae* challenge compared to mice without  
220 prior *S. Typhimurium* infection. This finding was associated with changes in innate  
221 cellular responses, most notably those of neutrophils, which were decreased in the  
222 parenchyma, clustering in the lung vasculature, and associated with increased NETosis  
223 in those with secondary infection. As neutrophils are essential for pulmonary clearance  
224 of bacterial infections such as *K. pneumoniae* [31], it is possible that intestinal infection  
225 impairs the recruitment and function of lung neutrophil responses against *K.*  
226 *pneumoniae*, leading to an inability to clear the lung bacterial infection, thereby  
227 worsening airway disease.

228

229 In addition to epidemiological studies showing a higher susceptibility to pulmonary  
230 infections after intestinal infection in children [2-5], and that intestinal diseases are often  
231 associated with pulmonary disorders [32-34], the immunological crosstalk of the lung-  
232 gut axis is not well understood. In the context of IBD, it has been proposed that  
233 intestinal inflammation and increased cytokine levels create conditions favorable for  
234 neutrophil margination onto the lung endothelium [35, 36]. When the lung encounters a  
235 secondary insult, neutrophil recruitment, activation and extravasation could mediate  
236 lung tissue injury and IBD-induced respiratory diseases [17, 37]. Our knowledge of how  
237 intestinal infection impacts the recruitment, extravasation and function of neutrophils in  
238 tissues outside of the intestine is limited. Studies have shown that GM-CSF plays an  
239 important role in neutrophil accumulation [38, 39], and GM-CSF is protective in  
240 preclinical models of pneumonia-associated lung injury [40, 41]. We found a significantly  
241 lower lung GM-CSF response to *K. pneumoniae* infection in mice with prior intestinal  
242 infection, which may decrease the lung's ability to recruit circulating neutrophils,  
243 resulting in an increased susceptibility to infection. In line with this, we also detected  
244 increased NETosis and microthrombosis in *K. pneumoniae* infection in mice with prior

245 intestinal infection as compared to mice without prior intestinal infection. It is likely that  
246 NETs and NET-associated factors, including histones and granule proteases, mediate  
247 vascular and tissue injury and contribute to microthrombosis [42-45]. The activation of  
248 NETosis also causes changes in neutrophil morphology including cell membrane  
249 rupture and neutrophil death [46]. We speculate that prior intestinal infection induces  
250 suicidal NETosis contributing to lower numbers of viable neutrophils in lungs. Future  
251 studies examining the mechanisms governing neutrophil activity, and activation of  
252 NETosis, in lung after intestinal infection are warranted.

253

254 Nonconventional T lymphocytes including MAIT cells,  $\gamma\delta$ -T cells and  $\alpha$  $\beta$ -T cells, have  
255 tissue-homing properties, and have been implicated in protection against respiratory  
256 bacterial infections [15]. Here, we found no differences in frequencies or number of  
257 these cells between the groups tested. Likewise, except for IFN- $\gamma$  we did not find any  
258 differences in cytokines that have been implicated in lung defense against bacterial  
259 pathogens, including IL-17A [47], TNF- $\alpha$  [48] and IL-10 [49, 50]. Both a protective [51]  
260 and detrimental [52] role of IFN- $\gamma$  has been reported against bacterial infections, and we  
261 found significant increase in lung IFN- $\gamma$  production in mice with intestinal infection. The  
262 importance of IFN- $\gamma$  production in our model is unclear and merits investigation. We  
263 observed higher frequencies of pDCs in lungs of mice with prior intestinal infection, and  
264 this may be related to the role of respiratory pDCs in tissue repair [53]. Alternatively,  
265 accumulation of pDCs in lung post intestinal infection may have involvement in the  
266 initiation of inflammation and antigen-specific T cell responses [54]. Moreover,  
267 frequencies of mDCs, which may contribute to control of secondary respiratory  
268 infection, was decreased in mice with prior intestinal infection [55, 56].

269

270 Our study has several limitations. Firstly, we did not account for the effect of the pre-  
271 existing intestinal microbiota; however, all mice were purchased from the same source,  
272 and were cohoused prior to infection. Secondly, we did not evaluate serum levels of IL-  
273 6, TNF- $\alpha$ , IFN- $\gamma$  and VEGF [35, 36] and neutrophil chemokines such as keratinocyte-  
274 derived chemokine (KC) [57], macrophage inflammatory protein 2 (MIP-2) [58], CXCL

275 receptor 2 (CXCR2) and CXC ligand 5 (CXCL5) [59] which would further our  
276 understanding of lung neutrophil trafficking following intestinal inflammation. Lastly, we  
277 have not investigated the role of innate lymphoid cells, which have shown to be  
278 recruited from gut to the lungs in response to inflammation [60, 61] [62].

279

280 In conclusion, the present study demonstrates that infection in the gut adversely  
281 impacts immunity in the lung and reveals potential mechanisms of immunological  
282 crosstalk between the lung and gut during enteric infection. While epidemiological  
283 studies have demonstrated this lung-gut association, we provide here novel findings  
284 that intestinal infection modulates neutrophil and cytokine responses in the lung,  
285 resulting in an increased susceptibility to a secondary pneumonia challenge. These data  
286 have the potential to inform efforts to prevent and treat respiratory infections in those  
287 with intestinal infection or inflammation.

## 288 **Materials and Methods**

### 289 **Bacterial strains**

290 *Salmonella enterica* serovar Typhimurium (provided by Dr. June Round) was grown  
291 overnight in Luria Broth (LB) supplemented with 100 µg/ml ampicillin and *K.*  
292 *pneumoniae* (subsp. *pneumoniae* (Schroeter) Trevisan (ATCC® 43816™), serotype 2)  
293 was grown overnight in Tryptic Soy Broth (TSB) at 37°C in a shaking incubator.  
294 Overnight cultures were diluted 1:10 in fresh medium and sub-cultured for 4 h under  
295 mild aeration. Bacteria were washed twice in phosphate-buffered saline (PBS) and then  
296 suspended in 1 ml PBS. *S.* Typhimurium culture (OD<sub>600</sub> = 0.1) was further diluted 1:10<sup>4</sup>  
297 in PBS and given to mice in 100 µl volume. *K. pneumoniae* (OD<sub>600</sub> = 0.4) culture was  
298 further diluted 1:10 and given to mice in 50 µl volume. Bacterial colony forming units  
299 (CFUs) were confirmed by culturing on LB + ampicillin agar plates for *S.* Typhimurium  
300 and MacConkey agar plates for *K. pneumoniae*.

301

### 302 **Mice and inoculations**

303 Six to eight week old female C57BL/6J wild type mice were obtained from Jackson  
304 Laboratories. All animals were maintained and experiments were performed in  
305 accordance with University of Utah and Institutional Animal Care and Use Committee  
306 (IACUC) approved guidelines (protocol no. 17-01011). The animals were kept at a  
307 constant temperature (25°C) with unlimited access to pellet diet and water in a room  
308 with a 12 h light/dark cycle. All animals were monitored daily and infected animals were  
309 scored for the signs of clinical illness severity [63]. Animals were ethically euthanized  
310 using CO<sub>2</sub>.

311

312 For the experiments, all mice were pretreated with streptomycin as described previously  
313 [64]. Briefly, water and food were withdrawn 4 hours before oral gavage treatment with  
314 7.5 mg of streptomycin in 100 µl HBSS. Afterward, animals were supplied with water  
315 and food ad libitum. At 20 h after streptomycin treatment, water and food were  
316 withdrawn again for 4 hours before the mice were infected with 10<sup>4</sup> CFU of serovar  
317 Typhimurium (oral gavage of 100 µl suspension in PBS) or treated with sterile PBS  
318 (control). (Note: we selected this dose of *S.* Typhimurium based on titration experiments

319 showing that at this dose, bacteria could be cultured from stool but not from lungs).  
320 Thereafter, drinking water and food ad libitum was offered immediately. Six days post  
321 infection (p.i.), mice were sacrificed by CO<sub>2</sub> asphyxiation, and lungs were removed for  
322 analysis.

323

324 For *K. pneumoniae* challenge experiments, six days post *S. Typhimurium* infection,  
325 isoflurane anesthetized mice were inoculated intranasally with ~ 10<sup>10</sup> CFU *K.*  
326 *pneumoniae* in 50 µl volume. Inoculated mice were observed until fully recovered from  
327 anesthesia and euthanized at 18 h post infection for *K. pneumoniae* bacterial load  
328 enumeration and innate immune response assessment. For survival studies, to reduce  
329 animal pain and respiratory distress, *K. pneumoniae* dose was reduced to 10<sup>5</sup> CFU .

330

### 331 **Lung Histology**

332 After sacrifice, mouse lungs were infused with 10% neutral buffered formalin via the  
333 trachea, fixed in formalin overnight, dehydrated in 70% ethyl alcohol and embedded in  
334 paraffin. 4 µm sections were stained with haematoxylin and eosin (H&E) and analysed  
335 by a board certified anatomic pathologist (A.H.G.). Samples were blinded prior to  
336 histopathologic analysis.

337

### 338 **Lung Neutrophil Extracellular Trap Assessment**

339 Paraffin imbedded mouse lung were cut at 8 µm thickness on a microtome. Sections  
340 were deparaffinized and rehydrated following xylene and decreasing concentration of  
341 ethanol washes. Heat induced epitope antigen retrieval of lung sections were  
342 processed in a 2100 Retriever Thermal Processor (Electron Microscopy Sciences,  
343 210050) containing Citrate buffer pH 6.0 solution (abcam, ab93678). Sections were  
344 incubated for 10 minutes with 0.1% Triton-X-100 and blocked with 10% Donkey Serum  
345 for 1 hour at RT. Antibodies for citrullinated Histone H3 (Abcam, ab5103) and  
346 Myeloperoxidase (R&D Systems, AF3667) were incubated at 1:100 dilution in 10%  
347 donkey serum overnight at 4°C. After washing sections with PBS, secondary rabbit and  
348 goat antibodies conjugated to Alexa Fluor 488 or Alexa Fluor 546, respectively, along  
349 with DAPI nuclear stain were incubated on sections for 90 minutes at 4°C. Sections

350 were washed and coverslips were adhered with aqueous mounting medium (Dako,  
351 S3025). Images were acquired on an Olympus FV3000 Confocal Laser Scanning  
352 Microscope at 20X and 60X magnification. FluoView software (Olympus) and ImageJ  
353 Fiji (NIH) were used for image processing and analysis. We quantified NET formation  
354 on the images using a standardized grid system as previously described [65]. Briefly,  
355 we used ImageJ software to place a standardized grid on randomly selected high-power  
356 field images (n=5 field images/sample). The number of times that any NET crossed a  
357 grid line was tallied.

358

### 359 **Lung mononuclear cell isolation**

360 For lung digestion and preparation of single cell suspensions, lungs were perfused  
361 using 5 mL sterile PBS, aseptically harvested from euthanized mice and kept in RPMI  
362 with 10% Fetal Bovine Serum (FBS). Lungs were dissociated using the mouse Lung  
363 Dissociation Kit (Miltenyi Biotec) and the gentleMACS Dissociator (Miltenyi Biotec) as  
364 per manufacturer's instructions. After dissociation, cells were passed through a 70  $\mu$ m  
365 cell strainer and washed with RPMI with 10% FBS. Red blood cells were lysed with red  
366 blood cell lysis buffer. Lung mononuclear cells were then washed twice in RPMI with  
367 10% FBS before use in subsequent experiments.

368

### 369 **Bacterial Load quantification**

370 *K. pneumoniae* bacterial load was determined by plating ten-fold serial dilutions of the  
371 lung homogenates onto MacConkey agar plates (Sigma-Aldrich). The plates were  
372 incubated at 37°C overnight before bacterial CFUs were determined by colony counts.

373

### 374 **Mouse inflammation quantification**

375 Lungs homogenates were filtered on 70  $\mu$ m cell strainers and centrifuged at 300  $\times$  g for  
376 5 min. Supernatants were stored at -80°C for cytokine content analysis. Lung cytokine  
377 levels were assessed from the supernatant samples via LEGENDplex kit (mouse  
378 inflammation panel 13-plex; BioLegend) per manufacturer's instructions. Cytokine levels  
379 were acquired using a FACSCanto II flow cytometer (BD Biosciences, San Jose, CA),  
380 and analyses were performed using LEGENDplex data analysis software (BioLegend).



## 381 **Tetramer and antibody surface-staining of lung single cell suspensions**

382 From each group of animals, 1-2 million cell aliquots were prepared and stained with the  
383 fixable viability dye eFluor™ 780 (eBioscience) for 15 min at room temperature (RT) to  
384 exclude dead cells from analysis. The cells were washed with PBS + 2% FBS and  
385 incubated with anti-mouse CD16/CD32 Fc Block antibody (BD Biosciences, USA), for  
386 20 min at 4 °C. Cells were then stained for 30 min at RT with appropriately diluted PE  
387 conjugated MR-1-5-OP-RU tetramers or  $\alpha$ -GalCer (PBS-44)-loaded CD1d tetramer  
388 conjugated to APC, anti-CD3-FITC (Biolegend), anti-CD161-BV510 (Biolegend), anti-  
389 CD49b-BV711 (BD), anti-TCR $\gamma\delta$ -PE-Cy7 (Biolegend), anti-TCR $\beta$ -BV421 (Biolegend),  
390 anti-CD45R-PE-Cy5 and anti-CD44-BV650 (Biolegend). To evaluate different antigen  
391 presenting cells, after Fc Block incubation, cells were also surface stained with anti-  
392 CD45 AF700 (Biolegend), anti-CD11b-FITC (Biolegend), anti-CD11c-PE Cy-7 (BD),  
393 anti-Siglec-F- BV711 (BD), anti-CD64-BV605 (Biolegend), anti-CD24-PE (Biolegend),  
394 anti-Ly-6G-PerCP-Cy5.5 (Biolegend), anti-CD103-BV510 (Biolegend), anti-mPDCA-1  
395 APC (Miltenyi Biotec) and anti-MHC II BV421 (Biolegend) for 30 min at 4 °C. A total of  
396  $10^6$  gated events per sample were collected using the BD Fortessa flow cytometer  
397 (Becton Dickinson, San Diego, CA), and results were analyzed using FlowJo 10.4.2  
398 software.

399

## 400 **Statistical analysis**

401 GraphPad Prism 6 software was used for statistical analysis. The Mann-Whitney *U* test  
402 was used for comparison of continuous variables between uninfected and *S.*  
403 *Typhimurium* infected group and between mice with prior intestinal infection and without  
404 prior intestinal infection. Results were presented as mean  $\pm$  standard deviation, and  $p <$   
405 0.05 was considered statistically significant.

406

## 407 **Acknowledgements**

408 This work was supported in part by grant W81XWH-17-1-0109 from the Department of  
409 Defense (to D.T.L.), and by the National Institutes of Health (R01 HD093826 to C.C.Y.).  
410 This work was supported by the University of Utah Flow Cytometry Facility in addition to



411 the National Cancer Institute through Award Number 5P30CA042014-24, and CMC  
412 animal facility. We would also like to thank Cole Anderson, Michael Graves, Alexandra  
413 Heitkamp and Melanie Prettyman for their technical assistance.

## 414 **References**

- 415 1. Liu L, Oza S, Hogan D, Chu Y, Perin J, Zhu J, et al. Global, regional, and national  
416 causes of under-5 mortality in 2000–15: an updated systematic analysis with  
417 implications for the Sustainable Development Goals. *The Lancet*.  
418 2016;388(10063):3027-35. doi: 10.1016/s0140-6736(16)31593-8.
- 419 2. Ashraf S, Huque MH, Kenah E, Agboatwalla M, Luby SP. Effect of recent diarrhoeal  
420 episodes on risk of pneumonia in children under the age of 5 years in Karachi, Pakistan.  
421 *International Journal of Epidemiology*. 2013;42(1):194-200. doi: 10.1093/ije/dys233.
- 422 3. Leung DT, Das SK, Faruque ASG, Malek MA, Chisti MJ, Qadri F, et al. Concurrent  
423 Pneumonia in Children Under 5 Years of Age Presenting to a Diarrheal Hospital in  
424 Dhaka, Bangladesh. *The American Journal of Tropical Medicine and Hygiene*.  
425 2015;93(4):831-5. doi: 10.4269/ajtmh.15-0074.
- 426 4. Schmidt WP, Cairncross S, Barreto ML, Clasen T, Genser B. Recent diarrhoeal  
427 illness and risk of lower respiratory infections in children under the age of 5 years.  
428 2009;38(3):766-72. doi: 10.1093/ije/dyp159.
- 429 5. Walker CL, Perin J, Katz J, Tielsch JM, Black RE. Diarrhea as a risk factor for acute  
430 lower respiratory tract infections among young children in low income settings. *J Glob*  
431 *Health*. 2013;3(1):010402. Epub 2013/07/05. doi: 10.7189/jogh.03.010402. PubMed  
432 PMID: 23826506; PubMed Central PMCID: PMC3700029.
- 433 6. Liu Y, Wang X-Y, Yang X, Jing S, Zhu L, Gao S-H. Lung and Intestine: A Specific  
434 Link in an Ulcerative Colitis Rat Model. 2013;2013:1-13. doi: 10.1155/2013/124530.
- 435 7. Powell N, Walker MM, Talley NJ. Gastrointestinal eosinophils in health, disease and  
436 functional disorders. *Nat Rev Gastroenterol Hepatol*. 2010;7(3):146-56. Epub  
437 2010/02/04. doi: 10.1038/nrgastro.2010.5. PubMed PMID: 20125092.
- 438 8. Rutten EPA, Lenaerts K, Buurman WA, Wouters EFM. Disturbed intestinal integrity  
439 in patients with COPD: effects of activities of daily living. *Chest*. 2014;145(2):245-52.  
440 Epub 2013/08/10. doi: 10.1378/chest.13-0584. PubMed PMID: 23928850.
- 441 9. Tulic MK, Piche T, Verhasselt V. Lung-gut cross-talk: evidence, mechanisms and  
442 implications for the mucosal inflammatory diseases. *Clinical & Experimental Allergy*.  
443 2016;46(4):519-28. doi: 10.1111/cea.12723.

- 444 10. Wang H, Liu J-S, Peng S-H, Deng X-Y, Zhu D-M, Javidiparsijani S, et al. Gut-lung  
445 crosstalk in pulmonary involvement with inflammatory bowel diseases. *World J*  
446 *Gastroenterol.* 2013;19(40):6794-804. Epub 2013/10/28. doi: 10.3748/wjg.v19.i40.6794.  
447 PubMed PMID: 24187454.
- 448 11. Schuijt TJ, Lankelma JM, Scicluna BP, De Sousa E Melo F, Roelofs JJTH, De Boer  
449 JD, et al. The gut microbiota plays a protective role in the host defence against  
450 pneumococcal pneumonia. *Gut.* 2016;65(4):575-83. doi: 10.1136/gutjnl-2015-309728.
- 451 12. Tsay T-B, Yang M-C, Chen P-H, Hsu C-M, Chen L-W. Gut flora enhance bacterial  
452 clearance in lung through toll-like receptors 4. 2011;18(1):68. doi: 10.1186/1423-0127-  
453 18-68.
- 454 13. Budden KF, Gellatly SL, Wood DLA, Cooper MA, Morrison M, Hugenholtz P, et al.  
455 Emerging pathogenic links between microbiota and the gut–lung axis. *Nature Reviews*  
456 *Microbiology.* 2017;15(1):55-63. doi: 10.1038/nrmicro.2016.142.
- 457 14. Bennett MS, Round JL, Leung DT. Innate-like lymphocytes in intestinal infections.  
458 *Current Opinion in Infectious Diseases.* 2015;28(5):457-63. doi:  
459 10.1097/qco.000000000000189.
- 460 15. Ivanov S, Paget C, Trottein F. Role of Non-conventional T Lymphocytes in  
461 *Respiratory Infections: The Case of the Pneumococcus.* 2014;10(10):e1004300. doi:  
462 10.1371/journal.ppat.1004300.
- 463 16. Ruane D, Brane L, Reis BS, Cheong C, Poles J, Do Y, et al. Lung dendritic cells  
464 induce migration of protective T cells to the gastrointestinal tract. *J Exp Med.*  
465 2013;210(9):1871-88. Epub 2013/08/21. doi: 10.1084/jem.20122762. PubMed PMID:  
466 23960190; PubMed Central PMCID: PMC3754860.
- 467 17. Mateer SW, Maltby S, Marks E, Foster PS, Horvat JC, Hansbro PM, et al. Potential  
468 mechanisms regulating pulmonary pathology in inflammatory bowel disease.  
469 2015;98(5):727-37. doi: 10.1189/jlb.3ru1114-563r.
- 470 18. Bonniere P, Wallaert B, Cortot A, Marchandise X, Riou Y, Tonnel AB, et al. Latent  
471 pulmonary involvement in Crohn's disease: biological, functional, bronchoalveolar  
472 lavage and scintigraphic studies. 1986;27(8):919-25. doi: 10.1136/gut.27.8.919.
- 473 19. Fireman Z, Osipov A, Kivity S, Kopelman Y, Sternberg A, Lazarov E, et al. The use  
474 of induced sputum in the assessment of pulmonary involvement in Crohn's disease. *Am*

- 475 J Gastroenterol. 2000;95(3):730-4. Epub 2000/03/10. doi: 10.1111/j.1572-  
476 0241.2000.01843.x. PubMed PMID: 10710066.
- 477 20. Yamada M, Gomez JC, Chugh PE, Lowell CA, Dinauer MC, Dittmer DP, et al.  
478 Interferon- $\gamma$  production by neutrophils during bacterial pneumonia in mice. American  
479 journal of respiratory and critical care medicine. 2011;183(10):1391-401. Epub  
480 2010/12/17. doi: 10.1164/rccm.201004-0592OC. PubMed PMID: 21169470.
- 481 21. Pechous RD. With Friends Like These: The Complex Role of Neutrophils in the  
482 Progression of Severe Pneumonia. Front Cell Infect Microbiol. 2017;7:160-. doi:  
483 10.3389/fcimb.2017.00160. PubMed PMID: 28507954.
- 484 22. Kupz A, Scott TA, Belz GT, Andrews DM, Greyer M, Lew AM, et al. Contribution of  
485 Thy1+ NK cells to protective IFN- $\gamma$  production during *Salmonella typhimurium* infections.  
486 Proc Natl Acad Sci U S A. 2013;110(6):2252-7. Epub 2013/01/25. doi:  
487 10.1073/pnas.1222047110. PubMed PMID: 23345426; PubMed Central PMCID:  
488 PMC3568339.
- 489 23. Klose CS, Kiss EA, Schwierzeck V, Ebert K, Hoyler T, d'Hargues Y, et al. A T-bet  
490 gradient controls the fate and function of CCR6-ROR $\gamma$ t+ innate lymphoid cells. Nature.  
491 2013;494(7436):261-5. Epub 2013/01/22. doi: 10.1038/nature11813. PubMed PMID:  
492 23334414.
- 493 24. Spees AM, Kingsbury DD, Wangdi T, Xavier MN, Tsois RM, Bäumlner AJ.  
494 Neutrophils Are a Source of Gamma Interferon during Acute Salmonella enterica Serovar  
496 Typhimurium Colitis. Infection and Immunity. 2014;82(4):1692-7. doi: 10.1128/iai.01508-  
497 13.
- 498 25. Narasaraju T, Yang E, Samy RP, Ng HH, Poh WP, Liew AA, et al. Excessive  
499 neutrophils and neutrophil extracellular traps contribute to acute lung injury of influenza  
500 pneumonitis. Am J Pathol. 2011;179(1):199-210. Epub 2011/06/28. doi:  
501 10.1016/j.ajpath.2011.03.013. PubMed PMID: 21703402; PubMed Central PMCID:  
502 PMC3123873.
- 503 26. Porto BN, Stein RT. Neutrophil Extracellular Traps in Pulmonary Diseases: Too  
504 Much of a Good Thing? Frontiers in immunology. 2016;7:311-. doi:  
505 10.3389/fimmu.2016.00311. PubMed PMID: 27574522.

- 506 27. Lefrançois E, Mallavia B, Zhuo H, Calfee CS, Looney MR. Maladaptive role of  
507 neutrophil extracellular traps in pathogen-induced lung injury. *JCI Insight*.  
508 2018;3(3):e98178. doi: 10.1172/jci.insight.98178. PubMed PMID: 29415887.
- 509 28. Pulavendran S, Prasanthi M, Ramachandran A, Grant R, Snider TA, Chow VTK, et  
510 al. Production of Neutrophil Extracellular Traps Contributes to the Pathogenesis of  
511 *Francisella tularemia*. *Frontiers in Immunology*. 2020;11(679). doi:  
512 10.3389/fimmu.2020.00679.
- 513 29. von Brühl ML, Stark K, Steinhart A, Chandraratne S, Konrad I, Lorenz M, et al.  
514 Monocytes, neutrophils, and platelets cooperate to initiate and propagate venous  
515 thrombosis in mice in vivo. *J Exp Med*. 2012;209(4):819-35. Epub 2012/03/28. doi:  
516 10.1084/jem.20112322. PubMed PMID: 22451716; PubMed Central PMCID:  
517 PMCPMC3328366.
- 518 30. Bertin F-R, Rys RN, Mathieu C, Laurance S, Lemarié CA, Blostein MD. Natural killer  
519 cells induce neutrophil extracellular trap formation in venous thrombosis. *Journal of*  
520 *Thrombosis and Haemostasis*. 2019;17(2):403-14. doi: 10.1111/jth.14339.
- 521 31. Xiong H, Carter RA, Leiner IM, Tang Y-W, Chen L, Kreiswirth BN, et al. Distinct  
522 Contributions of Neutrophils and CCR2+ Monocytes to Pulmonary Clearance of  
523 Different *Klebsiella pneumoniae* Strains. *Infection and Immunity*. 2015;83(9):3418-27.  
524 doi: 10.1128/iai.00678-15. PubMed PMID: pub.1032709186.
- 525 32. Chikano S, Sawada K, Ohnishi K, Fukunaga K, Tanaka J, Shimoyama T. Interstitial  
526 Pneumonia Accompanying Ulcerative Colitis. *Internal Medicine*. 2001;40(9):883-6. doi:  
527 10.2169/internalmedicine.40.883.
- 528 33. Kelly MG, Frizelle FA, Thornley PT, Beckert L, Epton M, Lynch AC. Inflammatory  
529 bowel disease and the lung: is there a link between surgery and bronchiectasis?  
530 *International Journal of Colorectal Disease*. 2006;21(8):754-7. doi: 10.1007/s00384-  
531 006-0094-9.
- 532 34. Raj AA, Birring SS, Green R, Grant A, De Caestecker J, Pavord ID. Prevalence of  
533 inflammatory bowel disease in patients with airways disease. *Respiratory Medicine*.  
534 2008;102(5):780-5. doi: 10.1016/j.rmed.2007.08.014.

- 535 35. Rojo ÓP, Román ALS, Arbizu EA, De La Hera Martínez A, Sevillano ER, Martínez  
536 AA. Serum lipopolysaccharide-binding protein in endotoxemic patients with  
537 inflammatory bowel disease. 2007;13(3):269-77. doi: 10.1002/ibd.20019.
- 538 36. Scaldaferri F, Vetrano S, Sans M, Arena V, Straface G, Stigliano E, et al. VEGF-A  
539 Links Angiogenesis and Inflammation in Inflammatory Bowel Disease Pathogenesis.  
540 2009;136(2):585-95.e5. doi: 10.1053/j.gastro.2008.09.064.
- 541 37. Margraf A, Ley K, Zarbock A. Neutrophil Recruitment: From Model Systems to  
542 Tissue-Specific Patterns. Trends in Immunology. 2019. doi: 10.1016/j.it.2019.04.010.
- 543 38. Khajah M, Millen B, Cara DC, Waterhouse C, McCafferty DM. Granulocyte-  
544 macrophage colony-stimulating factor (GM-CSF): a chemoattractive agent for murine  
545 leukocytes in vivo. J Leukoc Biol. 2011;89(6):945-53. Epub 2011/03/12. doi:  
546 10.1189/jlb.0809546. PubMed PMID: 21393420.
- 547 39. Laan M, Prause O, Miyamoto M, Sjostrand M, Hytonen AM, Kaneko T, et al. A role  
548 of GM-CSF in the accumulation of neutrophils in the airways caused by IL-17 and TNF-  
549 alpha. Eur Respir J. 2003;21(3):387-93. Epub 2003/03/29. PubMed PMID: 12661990.
- 550 40. Herold S, Hoegner K, Vadasz I, Gessler T, Wilhelm J, Mayer K, et al. Inhaled  
551 granulocyte/macrophage colony-stimulating factor as treatment of pneumonia-  
552 associated acute respiratory distress syndrome. Am J Respir Crit Care Med.  
553 2014;189(5):609-11. Epub 2014/03/04. doi: 10.1164/rccm.201311-2041LE. PubMed  
554 PMID: 24579839.
- 555 41. Quinton LJ. GM-CSF: a double dose of protection during pneumonia. Am J Physiol  
556 Lung Cell Mol Physiol. 2012;302(5):L445-6. Epub 2012/01/24. doi:  
557 10.1152/ajplung.00022.2012. PubMed PMID: 22268117.
- 558 42. Cheng OZ, Palaniyar N. NET balancing: a problem in inflammatory lung diseases.  
559 Frontiers in immunology. 2013;4:1-. doi: 10.3389/fimmu.2013.00001. PubMed PMID:  
560 23355837.
- 561 43. Yost CC, Schwertz H, Cody MJ, Wallace JA, Campbell RA, Vieira-de-Abreu A, et al.  
562 Neonatal NET-inhibitory factor and related peptides inhibit neutrophil extracellular trap  
563 formation. The Journal of clinical investigation. 2016;126(10):3783-98. Epub  
564 2016/09/06. doi: 10.1172/JCI83873. PubMed PMID: 27599294.

- 565 44. Martinod K, Wagner DD. Thrombosis: tangled up in NETs. *Blood*.  
566 2014;123(18):2768-76. doi: 10.1182/blood-2013-10-463646.
- 567 45. Fuchs TA, Brill A, Wagner DD. Neutrophil extracellular trap (NET) impact on deep  
568 vein thrombosis. *Arterioscler Thromb Vasc Biol*. 2012;32(8):1777-83. Epub 2012/05/31.  
569 doi: 10.1161/ATVBAHA.111.242859. PubMed PMID: 22652600.
- 570 46. Brinkmann V, Zychlinsky A. Beneficial suicide: why neutrophils die to make NETs.  
571 *Nat Rev Microbiol*. 2007;5(8):577-82. Epub 2007/07/17. doi: 10.1038/nrmicro1710.  
572 PubMed PMID: 17632569.
- 573 47. Simonian PL, Roark CL, Wehrmann F, Lanham AM, Born WK, O'Brien RL, et al. IL-  
574 17A-expressing T cells are essential for bacterial clearance in a murine model of  
575 hypersensitivity pneumonitis. *Journal of immunology (Baltimore, Md : 1950)*.  
576 2009;182(10):6540-9. doi: 10.4049/jimmunol.0900013. PubMed PMID: 19414809.
- 577 48. Skerrett SJ, Martin TR, Chi EY, Peschon JJ, Mohler KM, Wilson CB. Role of the type  
578 1 TNF receptor in lung inflammation after inhalation of endotoxin or *Pseudomonas*  
579 *aeruginosa*. *Am J Physiol*. 1999;276(5):L715-27. Epub 1999/05/18. doi:  
580 10.1152/ajplung.1999.276.5.L715. PubMed PMID: 10330027.
- 581 49. Kang MJ, Jang AR, Park JY, Ahn JH, Lee TS, Kim DY, et al. IL-10 Protects Mice  
582 From the Lung Infection of *Acinetobacter baumannii* and Contributes to Bacterial  
583 Clearance by Regulating STAT3-Mediated MARCO Expression in Macrophages. *Front*  
584 *Immunol*. 2020;11:270. Epub 2020/03/11. doi: 10.3389/fimmu.2020.00270. PubMed  
585 PMID: 32153580; PubMed Central PMCID: PMC7047127.
- 586 50. Moore TA, Standiford TJ. The role of cytokines in bacterial pneumonia: an  
587 inflammatory balancing act. *Proc Assoc Am Physicians*. 1998;110(4):297-305. Epub  
588 1998/08/01. PubMed PMID: 9686677.
- 589 51. Moore TA, Perry ML, Getsoian AG, Newstead MW, Standiford TJ. Divergent role of  
590 gamma interferon in a murine model of pulmonary versus systemic *Klebsiella*  
591 *pneumoniae* infection. *Infection and immunity*. 2002;70(11):6310-8. doi:  
592 10.1128/iai.70.11.6310-6318.2002. PubMed PMID: 12379710.
- 593 52. Schultz MJ, Rijneveld AW, Speelman P, van Deventer SJ, van der Poll T.  
594 Endogenous interferon-gamma impairs bacterial clearance from lungs during



- 595 Pseudomonas aeruginosa pneumonia. Eur Cytokine Netw. 2001;12(1):39-44. PubMed  
596 PMID: 11282544.
- 597 53. Gregorio J, Meller S, Conrad C, Di Nardo A, Homey B, Lauerma A, et al.  
598 Plasmacytoid dendritic cells sense skin injury and promote wound healing through type I  
599 interferons. J Exp Med. 2010;207(13):2921-30. Epub 2010/12/01. doi:  
600 10.1084/jem.20101102. PubMed PMID: 21115688; PubMed Central PMCID:  
601 PMC3005239.
- 602 54. Takagi H, Fukaya T, Eizumi K, Sato Y, Sato K, Shibasaki A, et al. Plasmacytoid  
603 dendritic cells are crucial for the initiation of inflammation and T cell immunity in vivo.  
604 Immunity. 2011;35(6):958-71. Epub 2011/12/20. doi: 10.1016/j.immuni.2011.10.014.  
605 PubMed PMID: 22177923.
- 606 55. Serbina NV, Salazar-Mather TP, Biron CA, Kuziel WA, Pamer EG. TNF/iNOS-  
607 producing dendritic cells mediate innate immune defense against bacterial infection.  
608 Immunity. 2003;19(1):59-70. Epub 2003/07/23. doi: 10.1016/s1074-7613(03)00171-7.  
609 PubMed PMID: 12871639.
- 610 56. Bieber K, Autenrieth SE. Dendritic cell development in infection. Molecular  
611 Immunology. 2020;121:111-7. doi: <https://doi.org/10.1016/j.molimm.2020.02.015>.
- 612 57. Frevert CW, Huang S, Danaee H, Paulauskis JD, Kobzik L. Functional  
613 characterization of the rat chemokine KC and its importance in neutrophil recruitment in  
614 a rat model of pulmonary inflammation. J Immunol. 1995;154(1):335-44. Epub  
615 1995/01/01. PubMed PMID: 7995953.
- 616 58. Greenberger MJ, Strieter RM, Kunkel SL, Danforth JM, Laichalk LL, McGillicuddy  
617 DC, et al. Neutralization of macrophage inflammatory protein-2 attenuates neutrophil  
618 recruitment and bacterial clearance in murine Klebsiella pneumonia. J Infect Dis.  
619 1996;173(1):159-65. Epub 1996/01/01. doi: 10.1093/infdis/173.1.159. PubMed PMID:  
620 8537653.
- 621 59. Tateda K, Moore TA, Newstead MW, Tsai WC, Zeng X, Deng JC, et al. Chemokine-  
622 dependent neutrophil recruitment in a murine model of Legionella pneumonia: potential  
623 role of neutrophils as immunoregulatory cells. Infect Immun. 2001;69(4):2017-24. Epub  
624 2001/03/20. doi: 10.1128/iai.69.4.2017-2024.2001. PubMed PMID: 11254553; PubMed  
625 Central PMCID: PMC3005239.



- 626 60. Huang Y, Mao K, Chen X, Sun MA, Kawabe T, Li W, et al. S1P-dependent  
627 interorgan trafficking of group 2 innate lymphoid cells supports host defense. *Science*.  
628 2018;359(6371):114-9. Epub 2018/01/06. doi: 10.1126/science.aam5809. PubMed  
629 PMID: 29302015.
- 630 61. Mjösberg J, Rao A. Lung inflammation originating in the gut. *Science*.  
631 2018;359(6371):36-7. doi: 10.1126/science.aar4301.
- 632 62. Huang Y, Guo L, Qiu J, Chen X, Hu-Li J, Siebenlist U, et al. IL-25-responsive,  
633 lineage-negative KLRG1hi cells are multipotential 'inflammatory' type 2 innate lymphoid  
634 cells. *Nature Immunology*. 2015;16(2):161-9. doi: 10.1038/ni.3078.
- 635 63. Burkholder T, Foltz C, Karlsson E, Linton CG, Smith JM. Health Evaluation of  
636 Experimental Laboratory Mice. *Current Protocols in Mouse Biology*. 2012;2(2):145-65.  
637 doi: 10.1002/9780470942390.mo110217.
- 638 64. Barthel M, Hapfelmeier S, Quintanilla-Martinez L, Kremer M, Rohde M, Hogardt M,  
639 et al. Pretreatment of Mice with Streptomycin Provides a *Salmonella enterica* Serovar  
640 Typhimurium Colitis Model That Allows Analysis of Both Pathogen and Host.  
641 2003;71(5):2839-58. doi: 10.1128/iai.71.5.2839-2858.2003.
- 642 65. Yost CC, Schwertz H, Cody MJ, Wallace JA, Campbell RA, Vieira-de-Abreu A, et al.  
643 Neonatal NET-inhibitory factor and related peptides inhibit neutrophil extracellular trap  
644 formation. *J Clin Invest*. 2016;126(10):3783-98. Epub 2016/09/07. doi:  
645 10.1172/jci83873. PubMed PMID: 27599294; PubMed Central PMCID:  
646 PMC5096809.

647

## 648 **Supporting information**

649 **Supplemental Figure S1: No differences in body weight loss between mice with or**  
650 **without *S. Typhimurium* prior infection post *K. pneumoniae* challenge .** Percent of  
651 initial body weight, statistical analysis was performed by fitting a mixed-effect model  
652 followed by Tukey's multiple comparisons test.

653 **Supplemental Figure S2: No neutrophil margination and necrotic clusters were**  
654 **detected in mice with intestinal *S. Typhimurium* infection (S) and mice with *K.***  
655 ***pneumoniae* respiratory infection (K).** Representative images (200x magnification) of  
656 lung sections stained with hematoxylin/eosin. Data represents cumulative results of two  
657 independent experiments (n = 2 for UI, n = 10 for S group, n = 9 for K group).

658 **Supplemental Figure S3: Pulmonary microthrombi in S and S+K treated mice.**  
659 Lung sections from S and S+K mice show scattered thrombus formation in capillary-  
660 sized vessels (black arrows), readily identified at the periphery of the lungs. H&E, 400x  
661 magnification. Data represents cumulative results of two independent experiments (n =  
662 2 for UI, n = 10 for S group, n = 9 for K group and n = 8 for S+K group).

663 **Supplemental Figure S4: Lung cytokine profiles showing no differences between**  
664 **the groups tested.** Levels of lung inflammatory cytokines (A) IL-23, (B) IL-1 $\alpha$ , (C) TNF-  
665  $\alpha$ , (D) IL-12p70, (E) IL-10, (F) IL-6, (G) IL-27, (H) IL-17A, (I) IFN $\beta$  were assessed 18  
666 hours post *K. pneumoniae* challenge via bead-based LEGENDplex mouse inflammation  
667 panel 13-plex assay. Data represents one experiment for uninfected mice (n =6) and *S.*  
668 *Typhimurium* infected mice (n =6) and cumulative results of three independent  
669 experiments for K (n = 18) and S+K group (n = 19). Error bars represents mean  $\pm$  SD  
670 and significance was determined by Mann-Whitney tests.

671 **Supplementary Figure S5: Mice with prior intestinal infection have lower number**  
672 **of total neutrophils in lungs post intranasal challenge with *K. pneumoniae*.** Using  
673 flow cytometry, total numbers of (A) neutrophils, (B) lung plasmacytoid dendritic cells  
674 (pDCs) and (C) monocytic dendritic cells (moDCs), (D) CD103+ DCs, (E) alveolar  
675 macrophages (AMs) and (F) interstitial macrophages (IMs) were evaluated between  
676 uninfected mice (UI), *S. Typhimurium* infected mice (S), *K. pneumoniae* infected mice  
677 (K) and both *S. Typhimurium* and *K. pneumoniae* infected mice (S+K). Data represents  
678 cumulative results of five independent experiments (n = 22 for UI, n = 24 for S, n = 25  
679 for K and n = 22 for S+K). Error bars represents mean  $\pm$  SD and significance was  
680 determined by Mann-Whitney tests.

681 **Supplemental Figure S6: Mice with prior *S. Typhimurium* intestinal infection have**  
682 **no differences in  $\alpha$ NKT, MAIT and TCR $\gamma\delta$  cells in response to respiratory *K.***  
683 ***pneumoniae* infection.** Using flow cytometry, percentage frequencies of (A)  $\alpha$ NKT cells,  
684 (B) MAIT cells and (C) TCR  $\gamma\delta$  cells were evaluated between uninfected mice (UI), *S.*  
685 *Typhimurium* infected mice (S), *K. pneumoniae* infected mice (K) and both *S.*  
686 *Typhimurium* and *K. pneumoniae* infected mice (S+K). Data represents cumulative  
687 results of five independent experiments (n = 22 for UI, n = 24 for S, n = 25 for K and n =  
688 22 for S+K). Error bars represents mean  $\pm$  SD and statistical significance was  
689 determined by using Mann-Whitney tests.

690 **Supplemental Figure S7: Mice with prior *S. Typhimurium* intestinal infection have**  
691 **no differences in blood leukocytes and platelets in response to respiratory *K.***  
692 ***pneumoniae* infection.** Using Hemavet analyzer, percentage frequencies of (A)  
693 neutrophils, (B) lymphocytes, (C) monocytes, (D) eosinophils, (E) basophils and blood  
694 platelet counts were assessed between *K. pneumoniae* infected mice (K) and both *S.*  
695 *Typhimurium* and *K. pneumoniae* infected mice (S+K). Data represents results of one  
696 experiment (n = 4 for K and n = 4 for S+K). Error bars represents mean  $\pm$  SD and  
697 statistical significance was determined by using Mann-Whitney tests. Data were  
698 analyzed by t-test and presented in mean  $\pm$  SD.

**Fig 1**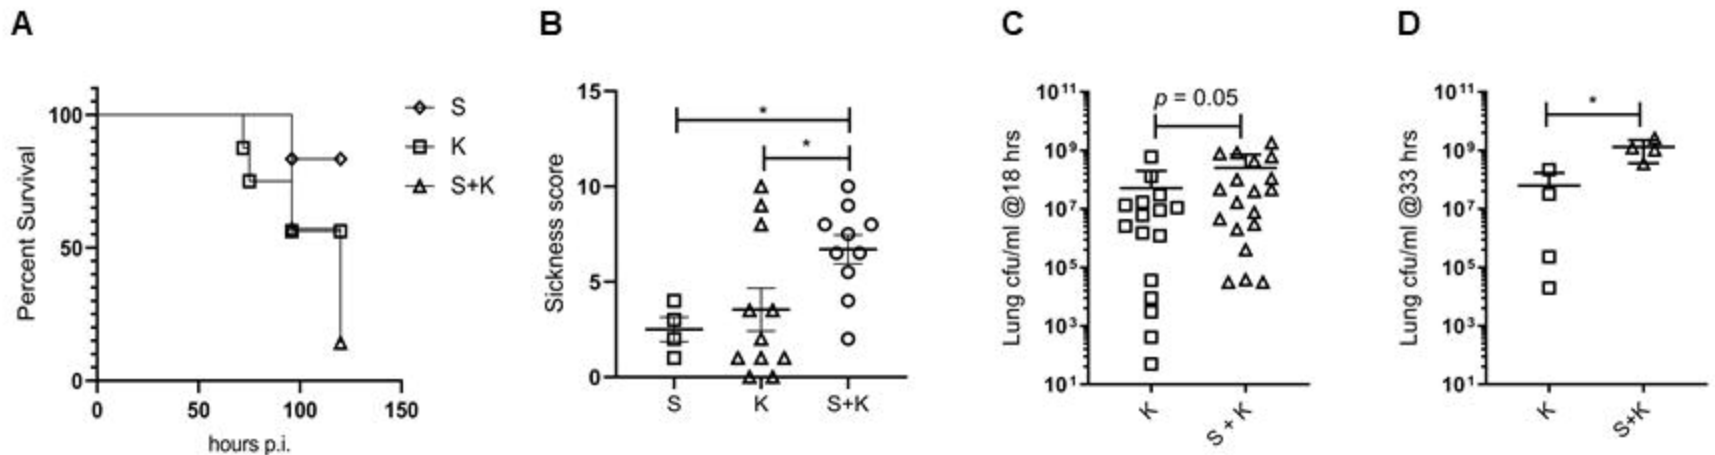

**Fig 1: Mice with prior *S. Typhimurium* intestinal infection have increased susceptibility to respiratory *K. pneumoniae* infection.** (A) Kaplan-Meier survival curves of mice infected with *S. Typhimurium* intestinal infection (S), *K. pneumoniae* infection only (K) and mice with prior *S. Typhimurium* intestinal infection and challenged with *K. pneumoniae* infection (S+K). Statistical analysis was performed using log-rank (Mantel-Cox) test,  $p = 0.07$  and log-rank test for significant trend,  $p = 0.02$  (B) sickness score plots where data represents cumulative results of two independent experiments ( $n = 4-6$  for S,  $n = 11$  for K and  $n = 10$  for S+K) and mean  $\pm$  SD, \* denotes  $p < 0.05$ . Statistical analysis was performed using Kruskal-Wallis test followed by Dunn's multiple comparison test. (C) *K. pneumoniae* bacterial load determined in lungs at 18 hours post *K. pneumoniae* infection in both K and S+K groups. Data represents cumulative results of three independent experiments ( $n = 16$  for K and  $n = 19$  for S+K). (D) Lung bacterial loads also determined at 33 hours in both groups ( $n = 4$  for each group). For (C) and (D) data represents mean  $\pm$  SD and statistical analysis was determined using Mann-Whitney test, \* denotes  $p < 0.05$ .

**Fig 2**

**A**

Uninfected

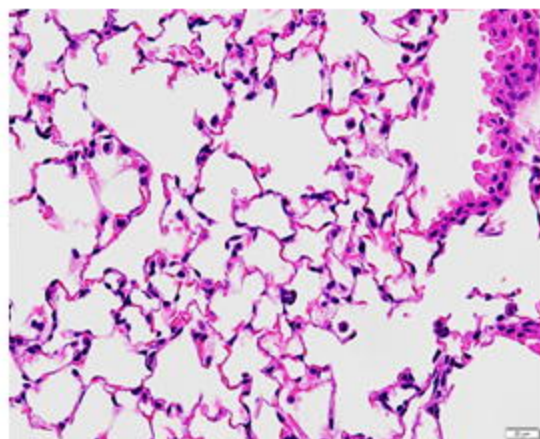

S

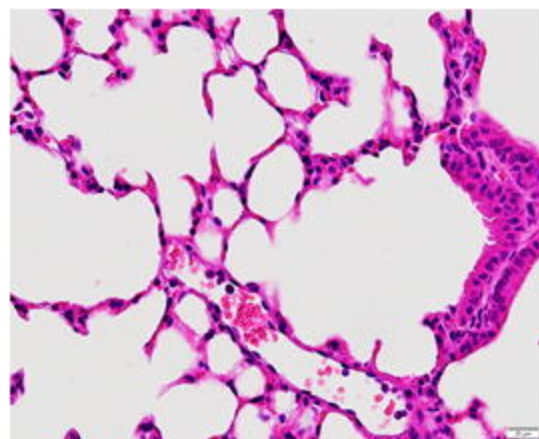

K

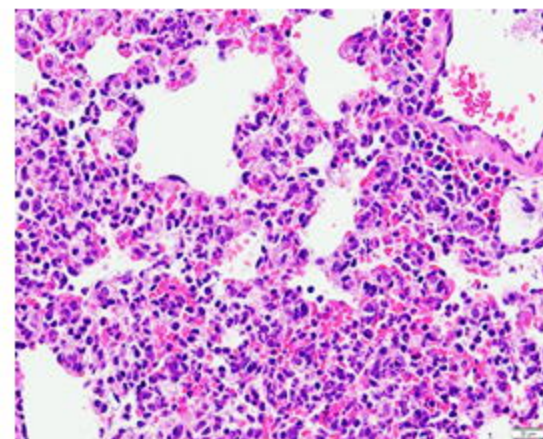

S+K

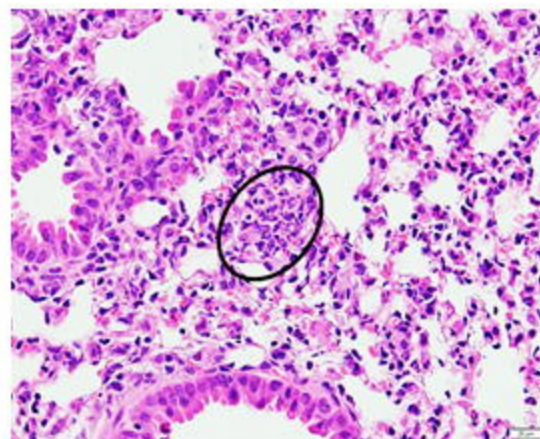

S+K

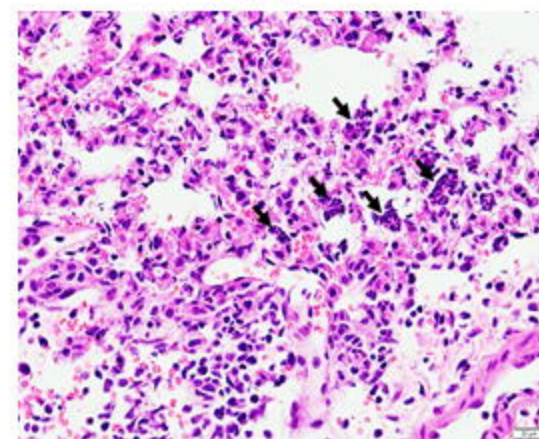



Fig 2

B

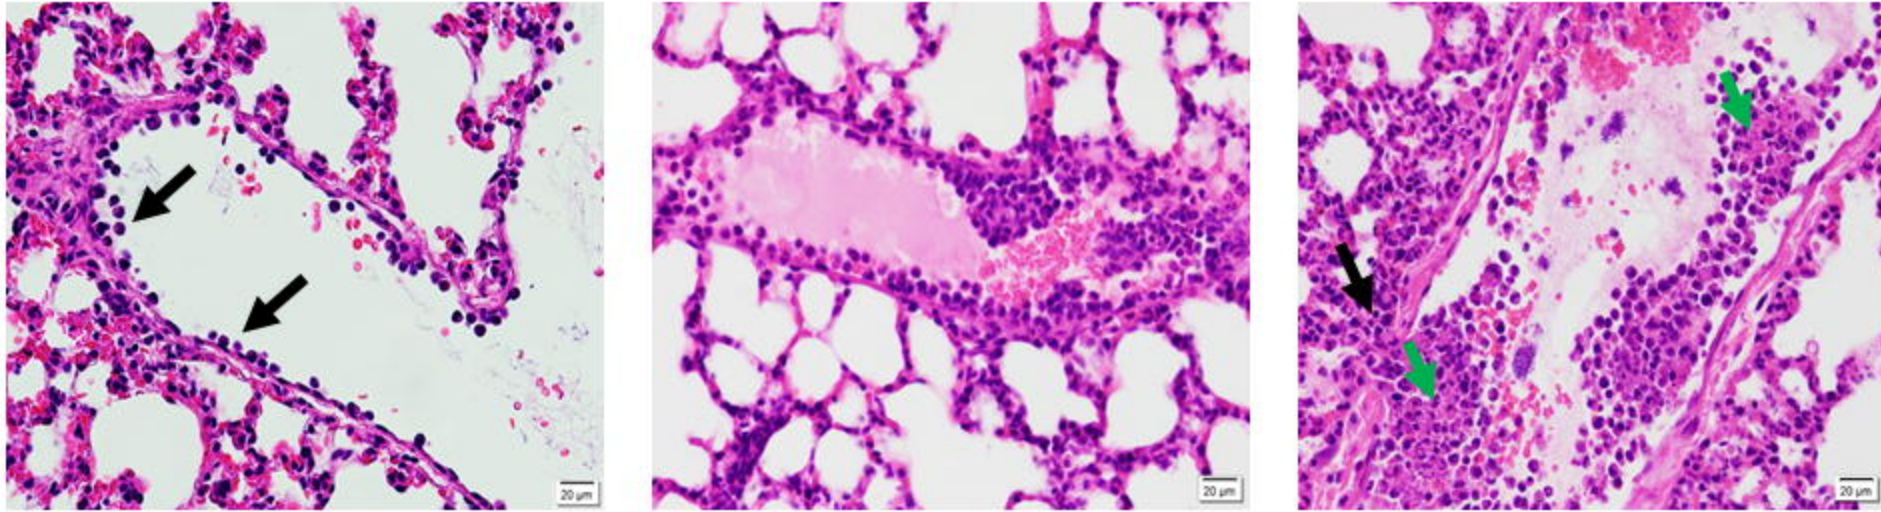

**Fig 2: Mice with prior *S. Typhimurium* intestinal infection have increased lung inflammation from subsequent respiratory *K. pneumoniae* infection, characterized by microabscess, pyknotic neutrophils and margination, compared to those with no prior intestinal infection.** (A) Representative images (400x magnification, scale bar = 20 µm) of lung sections stained with hematoxylin/eosin, normal lung in uninfected mice and in mice with intestinal infection (S). K mice show mixed interstitial inflammatory consolidations. Microabscess (circled) and clusters of pyknotic neutrophils (arrows) are apparent in mice with prior intestinal *S. Typhimurium* infection and challenged with *K. pneumoniae* infection (S+K). (B) Representative images (H & E, 400x magnification, scale bar = 20 µm) of lung sections of S + K infected mice. Lung vessels in S + K infected mice showing neutrophil margination (left, black arrows), margination and clustering (middle), necrotic clusters (right, green arrow) and extravasation (right, black arrow). Data represents cumulative results of two independent experiments (n = 2 for UI, n = 10 for S group, n = 9 for K group and n = 8 for S+K group).

**Fig 3**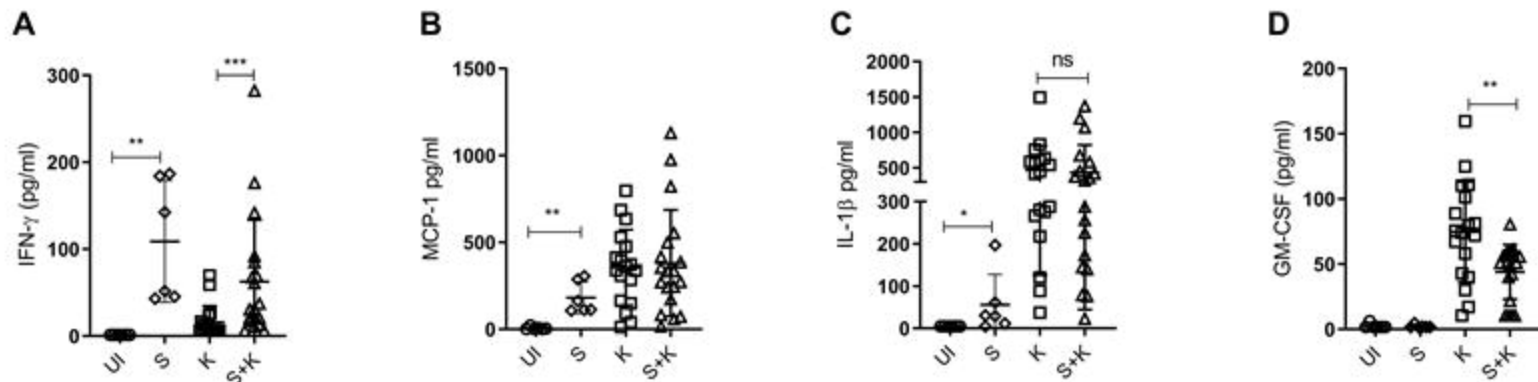

**Fig 3: Mice with prior *S. Typhimurium* intestinal infection have altered lung cytokine profiles, and altered cytokine responses to respiratory *K. pneumoniae* infection, compared to those with no prior intestinal infection.** Levels of lung inflammatory cytokines (A) IFN- $\gamma$ , (B) MCP-1, (C) IL-1 $\beta$  and (D) GM-CSF were assessed 18 hours post *K. pneumoniae* challenge via bead-based LEGENDplex mouse inflammation panel 13-plex assay. Data represents one experiment for uninfected mice (n =6) and *S. Typhimurium* infected mice (n =6) and cumulative results of three independent experiments for K (n = 18) and S+K group (n = 19). Error bars represents mean  $\pm$  SD and significance was determined by Mann-Whitney tests.

Fig 4

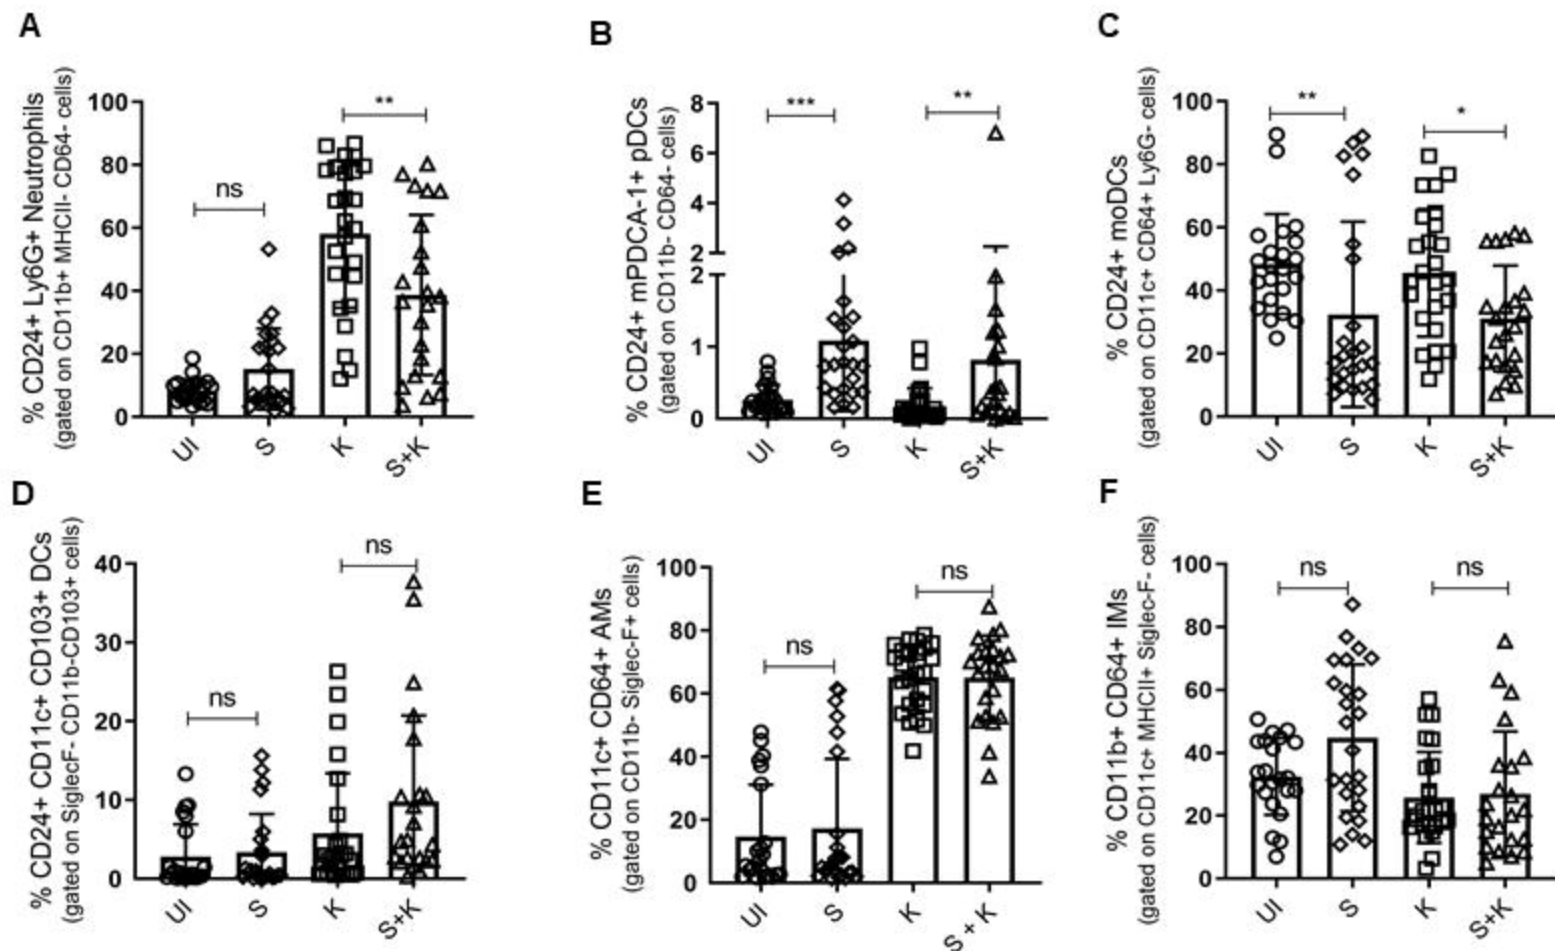

**Fig 4: Mice with prior *S. Typhimurium* intestinal infection have altered frequencies of innate cell types in the lung, and altered lung innate cellular responses to respiratory *K. pneumoniae* infection.** Using flow cytometry, percentage frequencies of (A) neutrophils, (B) lung plasmacytoid dendritic cells (pDCs), (C) monocytic dendritic cells (moDCs), (D) CD103+ DCs, (E) alveolar macrophages (AMs) and (F) interstitial macrophages (IMs) were evaluated between uninfected mice (UI), *S. Typhimurium* infected mice (S), *K. pneumoniae* infected mice (K) and both *S. Typhimurium* and *K. pneumoniae* infected mice (S+K). Data represents cumulative results of five independent experiments (n = 22 for UI, n = 24 for S, n = 25 for K and n = 22 for S+K). Error bars represents mean  $\pm$  SD and statistical significance was determined by using Mann-Whitney tests.



Fig 5

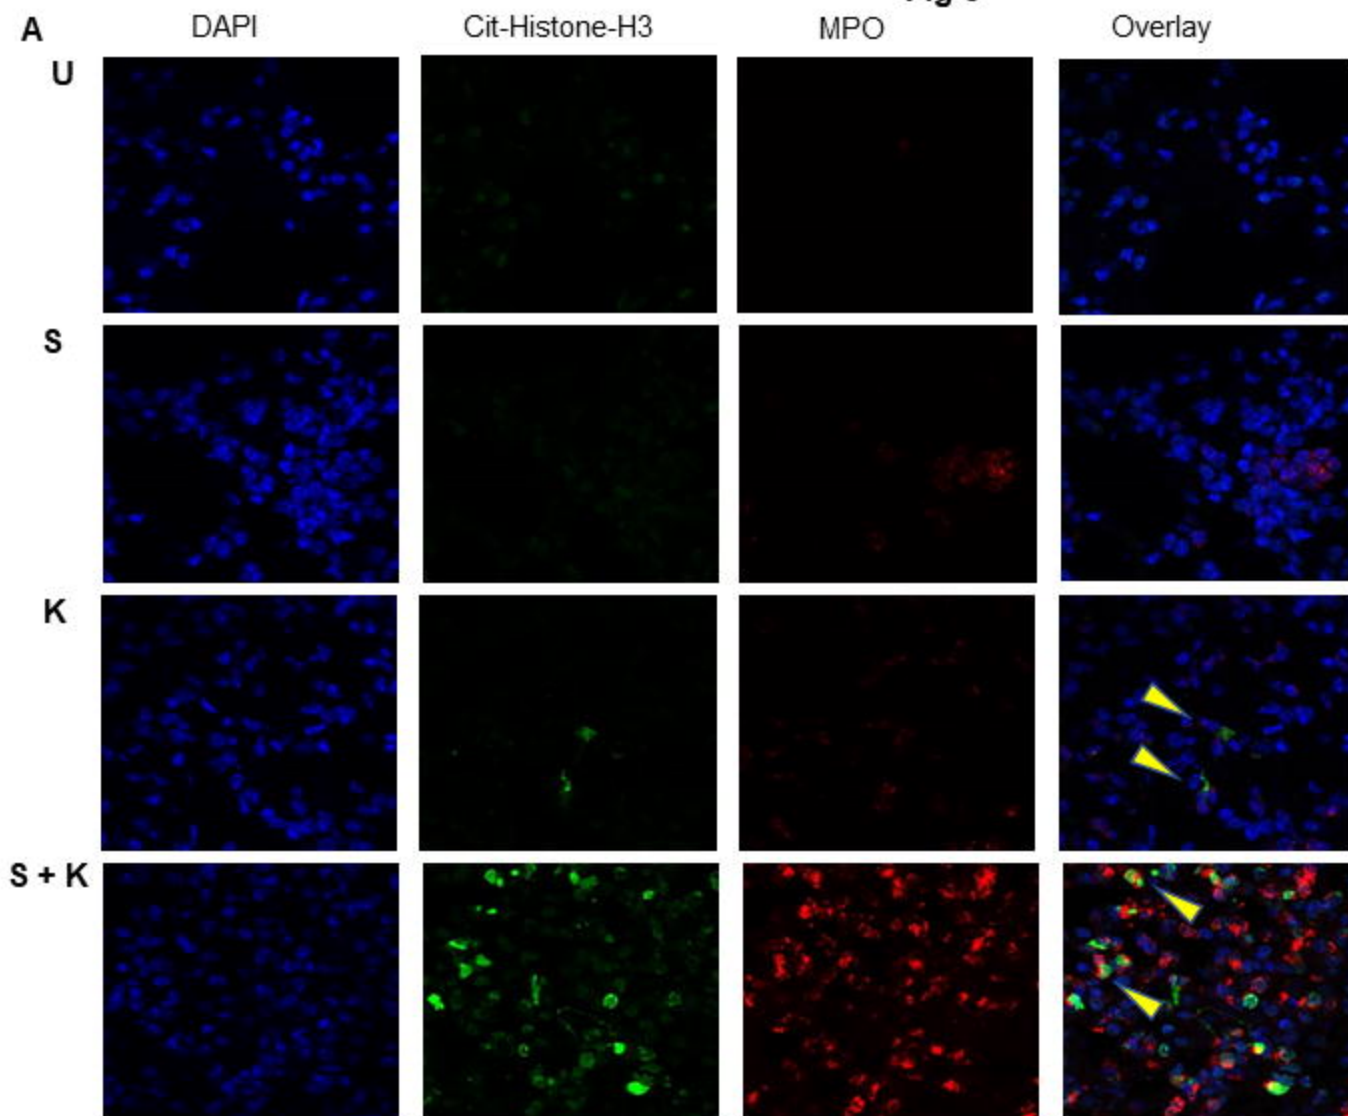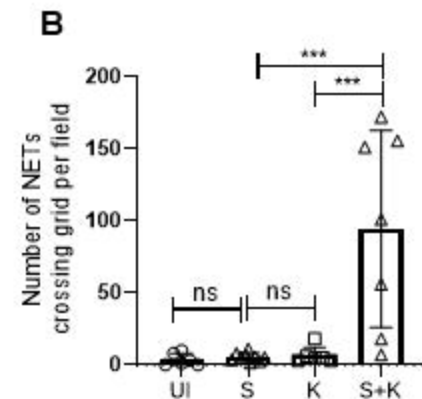

**Fig 5: Mice with prior *S. Typhimurium* intestinal infection have increased NETosis in lungs from subsequent respiratory *K. pneumoniae* infection, compared to those with no prior intestinal infection.** (A) Using Olympus FV3000 Confocal Laser Scanning Microscope, NET formation was assessed in all four groups and images were taken at 60X magnification. Blue fluorescence, nuclear DNA; green fluorescence, NET-associated citrullinated histone H3; red fluorescence, myeloperoxidase (MPO); NETs, yellow arrows in overlay. (B) Bar graph showing number of NETs crossing grid per field. One-way ANOVA with Tukey's post hoc testing. \*\*\* denotes  $P < 0.001$ .
